# Supplementary material for: Meta-Analysis of Differentiating Mouse Embryonic Stem Cell Gene Expression Kinetics Reveals Early Change of a Small Gene Set
Source: PLoS Comput Biol. 2006 Nov 24;2(11):e158. doi: 10.1371/journal.pcbi.0020158 (PMC1664699; doi:10.1371/journal.pcbi.0020158)
Supplement: Table S5 — (8 KB PDF) [file pcbi.0020158.st005.pdf]

## Biological Process

| TERM                                                                 | COUNT | PERCENTAGE |
|----------------------------------------------------------------------|-------|------------|
| REGULATION OF BIOLOGICAL PROCESS                                     | 23    | 25.6       |
| PHYSIOLOGICAL PROCESS                                                | 56    | 62.2       |
| NEGATIVE REGULATION OF METABOLISM                                    | 5     | 5.6        |
| METABOLISM                                                           | 40    | 44.4       |
| AXONOGENESIS                                                         | 4     | 4.4        |
| PROTEIN METABOLISM                                                   | 20    | 22.2       |
| DEVELOPMENT                                                          | 15    | 16.7       |
| CELLULAR PHYSIOLOGICAL PROCESS                                       | 28    | 31.1       |
| MACROMOLECULE METABOLISM                                             | 22    | 24.4       |
| PROTEIN AMINO ACID PHOSPHORYLATION                                   | 8     | 8.9        |
| PROTEIN MODIFICATION                                                 | 11    | 12.2       |
| CELL MIGRATION                                                       | 4     | 4.4        |
| REGULATION OF METABOLISM                                             | 16    | 17.8       |
| PHOSPHATE METABOLISM                                                 | 9     | 10         |
| PHOSPHORUS METABOLISM                                                | 9     | 10         |
| REGULATION OF CELL PROLIFERATION                                     | 4     | 4.4        |
| REGULATION OF PHYSIOLOGICAL PROCESS                                  | 16    | 17.8       |
| CELL GROWTH AND/OR MAINTENANCE                                       | 24    | 26.7       |
| PHOSPHORYLATION                                                      | 8     | 8.9        |
| MORPHOGENESIS                                                        | 10    | 11.1       |
| NEGATIVE REGULATION OF CYTOKINE BIOSYNTHESIS                         | 2     | 2.2        |
| NEGATIVE REGULATION OF CYTOKINE PRODUCTION                           | 2     | 2.2        |
| REGULATION OF TRANSCRIPTION                                          | 14    | 15.6       |
| REGULATION OF NUCLEOBASE, NUCLEOSIDE, NUCLEOTIDE AND NUCLEIC ACID ME | 14    | 15.6       |
| TRANSCRIPTION                                                        | 14    | 15.6       |
| CHEMOTAXIS                                                           | 3     | 3.3        |
| TAXIS                                                                | 3     | 3.3        |
| CELL MOTILITY                                                        | 4     | 4.4        |
| REGULATION OF TRANSCRIPTION, DNA-DEPENDENT                           | 13    | 14.4       |
| NEGATIVE REGULATION OF PROTEIN BIOSYNTHESIS                          | 2     | 2.2        |
| NUCLEOBASE, NUCLEOSIDE, NUCLEOTIDE AND NUCLEIC ACID METABOLISM       | 18    | 20         |
| NEGATIVE REGULATION OF BIOSYNTHESIS                                  | 2     | 2.2        |
| TRANSCRIPTION, DNA-DEPENDENT                                         | 13    | 14.4       |
| NEGATIVE REGULATION OF TRANSCRIPTION                                 | 3     | 3.3        |
| ORGANOGENESIS                                                        | 8     | 8.9        |
| NEGATIVE REGULATION OF NUCLEOBASE, NUCLEOSIDE, NUCLEOTIDE AND NUCLEI | 3     | 3.3        |
| GROWTH                                                               | 3     | 3.3        |
| RESPONSE TO CHEMICAL SUBSTANCE                                       | 4     | 4.4        |

## Molecular Function

| TERM                                                       | COUNT | PERCENTAG |
|------------------------------------------------------------|-------|-----------|
| TRANSCRIPTION REGULATOR ACTIVITY                           | 13    | 14.4      |
| PROTEIN SERINE/THREONINE KINASE ACTIVITY                   | 8     | 8.9       |
| TRANSCRIPTION FACTOR ACTIVITY                              | 11    | 12.2      |
| PROTEIN KINASE ACTIVITY                                    | 8     | 8.9       |
| BINDING                                                    | 46    | 51.1      |
| PURINE NUCLEOTIDE BINDING                                  | 13    | 14.4      |
| TRANSFERASE ACTIVITY                                       | 13    | 14.4      |
| NUCLEOTIDE BINDING                                         | 13    | 14.4      |
| PROTEIN-TYROSINE KINASE ACTIVITY                           | 6     | 6.7       |
| PHOSPHOTRANSFERASE ACTIVITY, ALCOHOL GROUP AS ACCEPTOR     | 8     | 8.9       |
| STEROID HORMONE RECEPTOR ACTIVITY                          | 3     | 3.3       |
| LIGAND-DEPENDENT NUCLEAR RECEPTOR ACTIVITY                 | 3     | 3.3       |
| GROWTH FACTOR ACTIVITY                                     | 4     | 4.4       |
| ATP BINDING                                                | 10    | 11.1      |
| ADENYL NUCLEOTIDE BINDING                                  | 10    | 11.1      |
| NUCLEIC ACID BINDING                                       | 19    | 21.1      |
| KINASE ACTIVITY                                            | 8     | 8.9       |
| TRANSFERASE ACTIVITY, TRANSFERRING PHOSPHORUS-CONTAINING G | 8     | 8.9       |
| DNA BINDING                                                | 13    | 14.4      |
| CATALYTIC ACTIVITY                                         | 25    | 27.8      |
| PROTEIN BINDING                                            | 14    | 15.6      |
| TRANSFERASE ACTIVITY, TRANSFERRING PENTOSYL GROUPS         | 2     | 2.2       |
